# Supplementary material for: Hypaphorine Attenuates Lipopolysaccharide-Induced Endothelial Inflammation via Regulation of TLR4 and PPAR-γ Dependent on PI3K/Akt/mTOR Signal Pathway
Source: Int J Mol Sci. 2017 Apr 17;18(4):844. doi: 10.3390/ijms18040844 (PMC5412428; doi:10.3390/ijms18040844)
Supplement: Supplementary file 1 [file ijms-18-00844-s001.pdf]

# Hypaphorine Attenuates Lipopolysaccharide-Induced Endothelial Inflammation via Regulation of TLR4 and PPAR- $\gamma$ Dependent on PI3K/Akt/mTOR Signal Pathway

Haijian Sun, Xuexue Zhu, Weiwei Cai and Liying Qiu

**Table S1.** Primer for RT-PCR analysis.

| Primers                  | Sequences (5'-3')         |
|--------------------------|---------------------------|
| GAPDH (Forward)          | CCACATCGCTCAGACACCAT      |
| GAPDH (Reverse)          | CCAGGCGCCCAATACG          |
| TNF- $\alpha$ (Forward)  | TGCTGCACTTTGGAGTGATCG     |
| TNF- $\alpha$ (Reverse)  | TGTCACCTCGGGGTTCGAGAAG    |
| IL-1 $\beta$ (Forward)   | TCCAGGGACAGGATATGGAG      |
| IL-1 $\beta$ (Reverse)   | TCTTCAACACGCAGGACAG       |
| MCP-1 (Forward)          | GATGCAATCAATGCCCCAGTC     |
| MCP-1 (Reverse)          | TCCTTGGCCACAATGGTCTTG     |
| TLR4 (Forward)           | ATGAAATGAGTTGCAGCAGA      |
| TLR4 (Reverse)           | AGCCATCGTTGTCTCCCTAA      |
| VCAM-1 (Forward)         | TTGCTGACAGCTGACCTTTG      |
| VCAM-1 (Reverse)         | TTTAGGCCACATTGGGAAAG      |
| PPAR- $\gamma$ (Forward) | ATTCCATTCACAAGAACAGATCCAG |
| PPAR- $\gamma$ (Reverse) | TTTATCTCCACAGACACGACATTCA |

Note: GAPDH, glyceraldehyde phosphate dehydrogenase; TNF- $\alpha$ , tumor necrosis factor- $\alpha$ ; IL-1 $\beta$ , interleukin-1 $\beta$ ; MCP-1, monocyte chemoattractant protein 1; TLR-4, toll-like receptor 4; VCAM-1, vascular ellular adhesion molecule-1; PPAR- $\gamma$ , peroxisome proliferator-activated receptor  $\gamma$ .

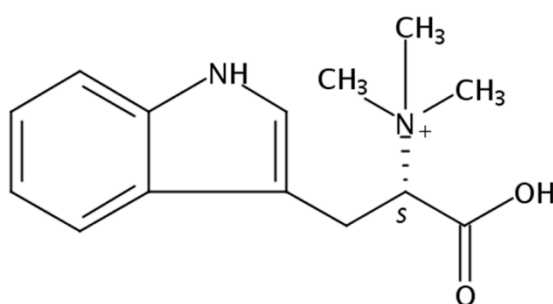

**Figure S1.** Chemical structures of investigated Hy.

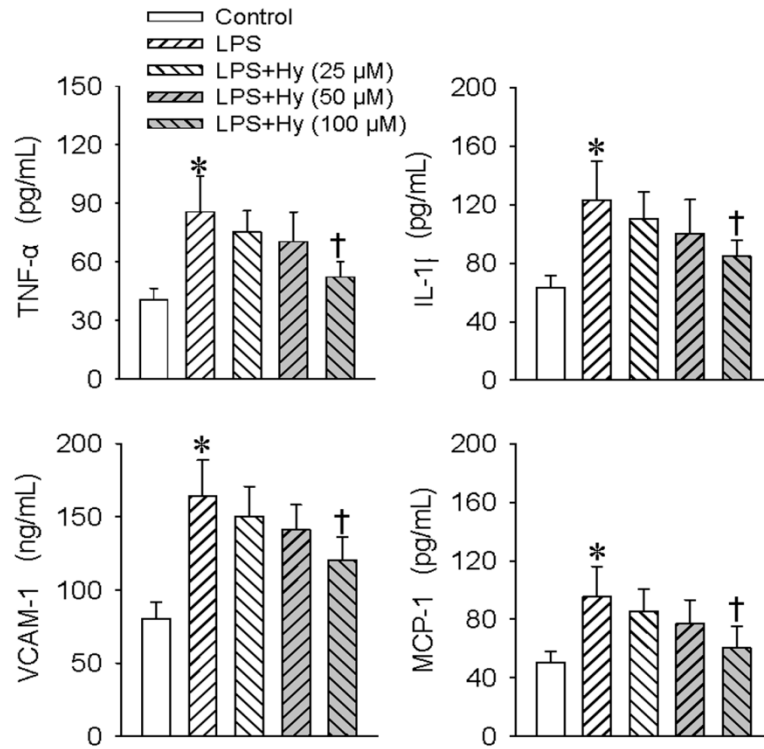

**Figure S2.** Effects of different doses of VH on the protein expressions of TNF- $\alpha$ , IL-1 $\beta$ , VCAM-1 and MCP-1 in HMEC-1 cells response to LPS. HMEC-1 cells were pretreated with different doses of VH for 6 h before LPS incubation for another 48 h. The protein expressions of TNF- $\alpha$ , IL-1 $\beta$ , VCAM-1 and MCP-1 were quantified by ELISA kits. Values are mean  $\pm$  S.D. \* $p$  < 0.05 vs. Control, † $p$  < 0.05 vs. LPS.  $n$  = 6 for each group. Hy, hypaphorine; LPS, lipopolysaccharide; TNF- $\alpha$ , tumor necrosis factor- $\alpha$ ; IL-1 $\beta$ , interleukin-1 $\beta$ ; VCAM-1, vascular cellular adhesion molecule-1; MCP-1, monocyte chemoattractant protein 1.

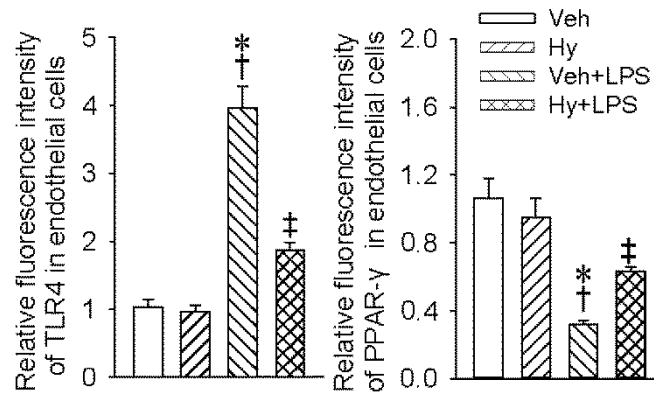

**Figure S3.** Average TLR4 or PPAR- $\gamma$  fluorescence intensity normalized to control was obtained from four independent experiments. The mean fluorescent intensity of TLR4 or PPAR- $\gamma$  in endothelial cells of the control group was normalized to 1.0. Values are mean  $\pm$  S.D. \* $p$  < 0.05 vs. Veh, † $p$  < 0.05 vs. VH, ‡ $p$  < 0.05 vs. Veh + LPS.  $n$  = 4 for each group. Hy, hypaphorine; LPS, lipopolysaccharide; PPAR- $\gamma$ , peroxisome proliferator-activated receptor  $\gamma$ .

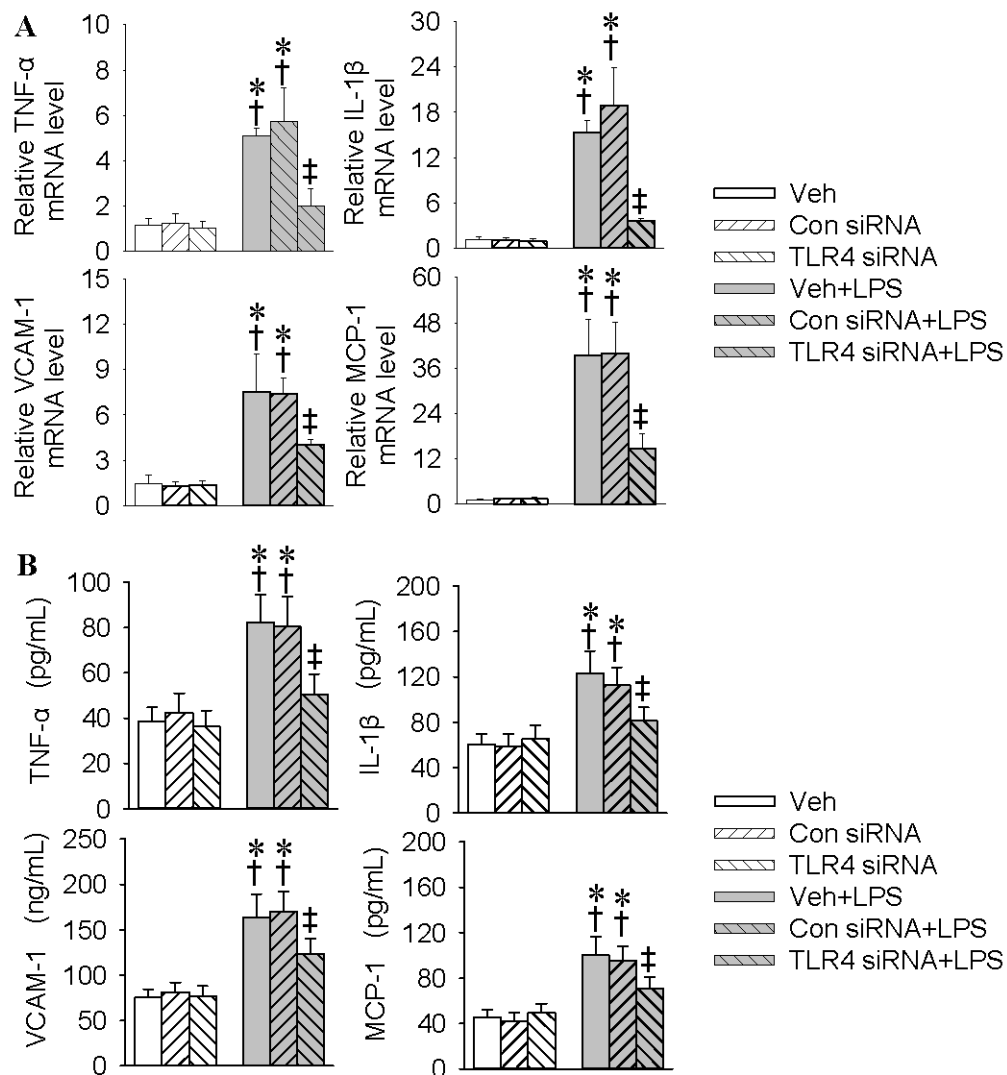

**Figure S4.** Knockdown of TLR4 alleviated inflammatory response in HMEC-1 cells response to LPS. The HMEC-1 cells were transfected with 100 nM Control siRNA or TLR4 siRNA for 24 h followed by LPS (500 ng/mL) stimulation for 48 h. The mRNA expressions of TNF- $\alpha$ , IL-1 $\beta$ , VCAM-1 and MCP-1 were detected by real time quantitative PCR (**A**) and ELISA (**B**). Values are mean $\pm$ S.D. \*  $p < 0.05$  vs. Veh, †  $p < 0.05$  vs. Con siRNA (Control siRNA), ‡  $p < 0.05$  vs Veh + LPS.  $n = 4$  for each group for PCR and  $n = 6$  for each group for ELISA. LPS, lipopolysaccharide; TNF- $\alpha$ , tumor necrosis factor- $\alpha$ ; IL-1 $\beta$ , interleukin-1 $\beta$ ; VCAM-1, vascular cellular adhesion molecule-1; MCP-1, monocyte chemoattractant protein 1.

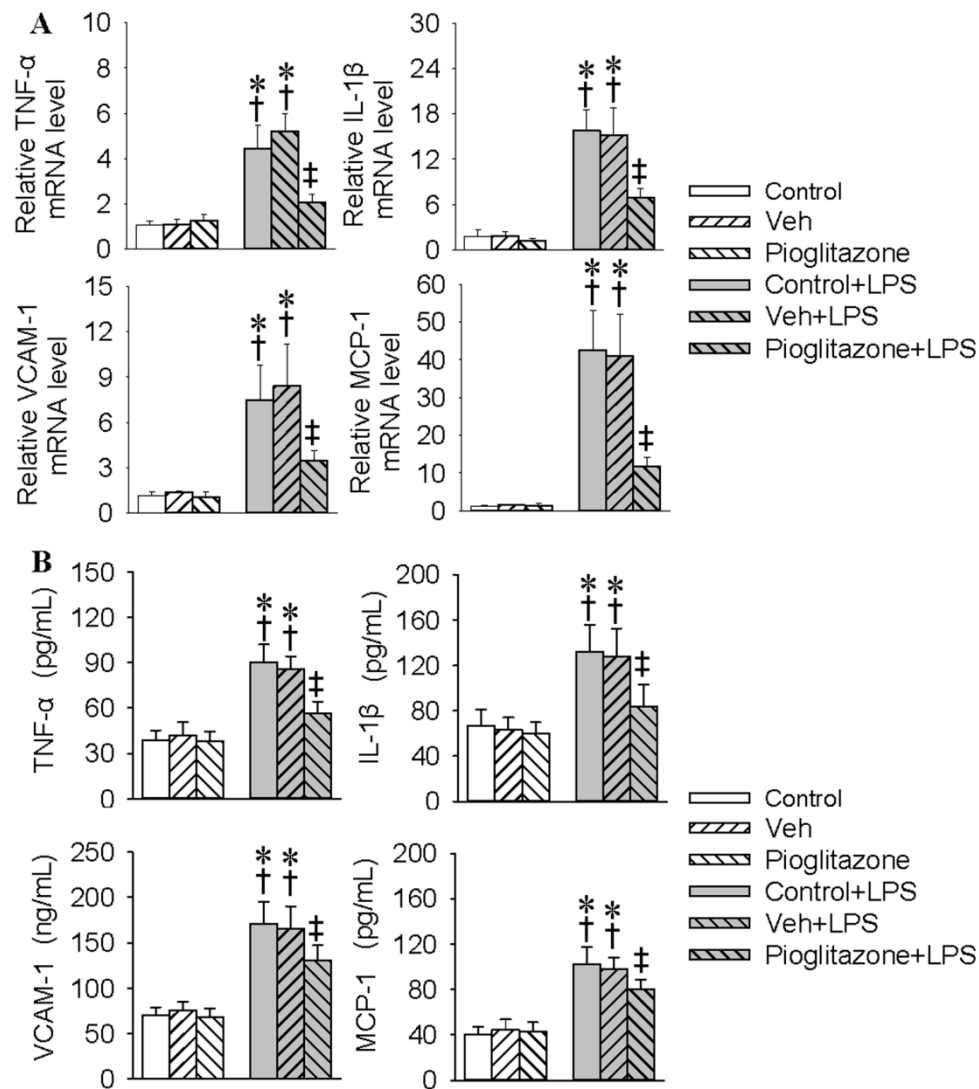

**Figure S5.** PPAR- $\gamma$  activation ameliorated inflammatory response in HMEC-1 cells response to LPS. The HMEC-1 cells were pre-incubated with pioglitazone (20  $\mu$ M) for 6 h followed by LPS (500 ng/ml) stimulation for 48 h. The mRNA expressions of TNF- $\alpha$ , IL-1 $\beta$ , VCAM-1 and MCP-1 were detected by real time quantitative PCR (A) and ELISA (B). Values are mean $\pm$ S.D. \* $p$  < 0.05 vs. Control, †  $p$  < 0.05 vs. Veh, ‡  $p$  < 0.05 vs. Control+LPS.  $n$  = 4 for each group for PCR and  $n$  = 6 for each group for ELISA. LPS, lipopolysaccharide; TNF- $\alpha$ , tumor necrosis factor- $\alpha$ ; IL-1 $\beta$ , interleukin-1 $\beta$ ; VCAM-1, vascular cellular adhesion molecule-1; MCP-1, monocyte chemoattractant protein 1.

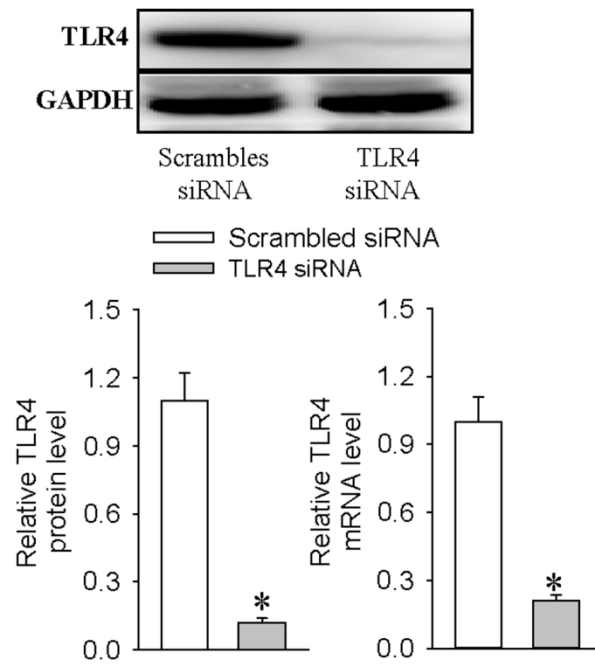

**Figure S6.** Knockdown of TLR4 with siRNA effectively downregulated the protein and mRNA levels of TLR4 in HMEC-1 cells. The HMEC-1 cells were transfected with 100 nM Control siRNA or TLR4 siRNA for 24 h followed by LPS (500 ng/mL) stimulation for 48 h. The protein and mRNA levels of TLR4 were measured by Western blot or RT-PCR, respectively. Values are mean  $\pm$  S.D. \*  $p < 0.05$  vs. Scrambled siRNA.  $n = 4$  for each group.

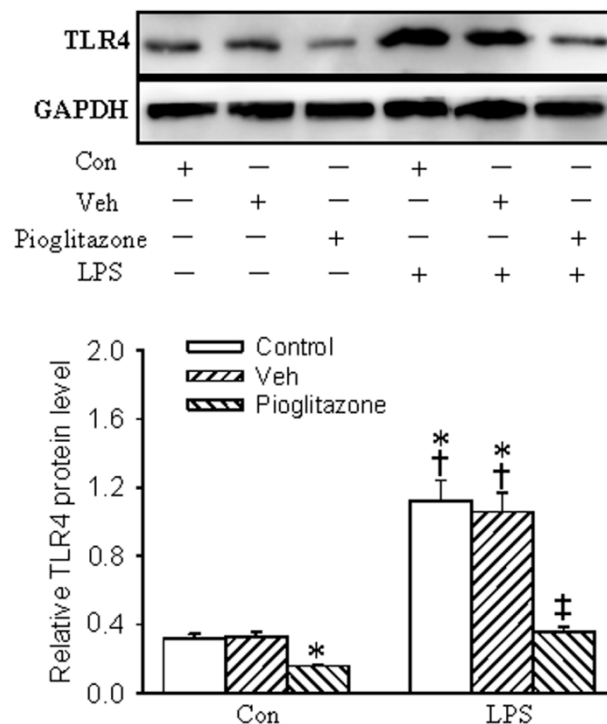

**Figure S7.** The EA.hy926 cells were pre-incubated with pioglitazone (20  $\mu$ M) for 6 h followed by LPS (500 ng/mL) stimulation for 48 h. The protein levels of TLR4 were measured by Western blot. Values are mean  $\pm$  S.D. \*  $p < 0.05$  vs. Control, †  $p < 0.05$  vs. Veh (Vehicle), ‡  $p < 0.05$  vs. Pioglitazone.  $n = 4$  for each group. Hy, hypaphorine; LPS, lipopolysaccharide; PPAR- $\gamma$ , peroxisome proliferator-activated receptor  $\gamma$ .

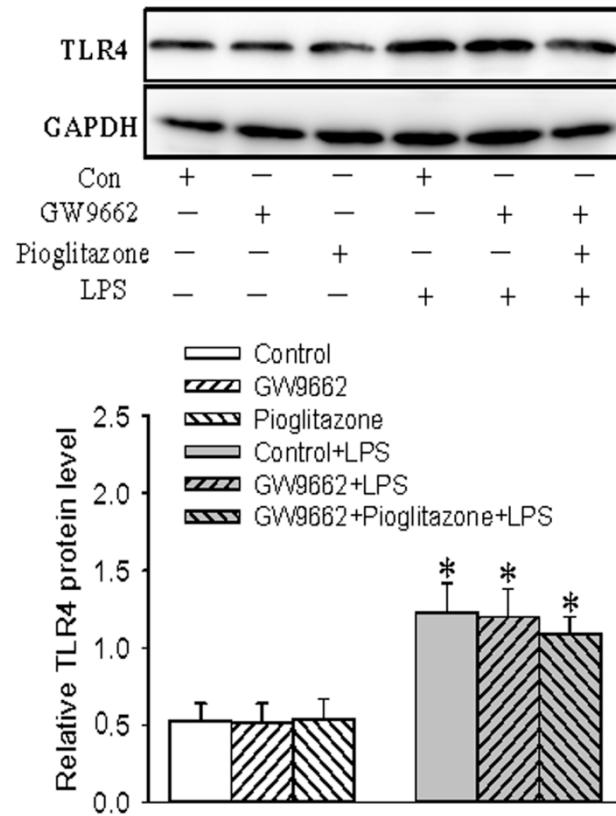

**Figure S8.** GW9662, a PPAR- $\gamma$  antagonist, blocked pioglitazone-mediated inhibition of TLR4 in LPS-challenged HMEC-1 cells. The HMEC-1 cells were pre-incubated with GW9662 (10  $\mu$ M) for 30 min, and then pioglitazone (20  $\mu$ M) for 6 h, followed by LPS (500 ng/mL) stimulation for 48 h. The protein levels of TLR4 were measured by Western blot. Values are mean  $\pm$  S.D. \*  $p < 0.05$  vs. Control.  $n = 4$  for each group.

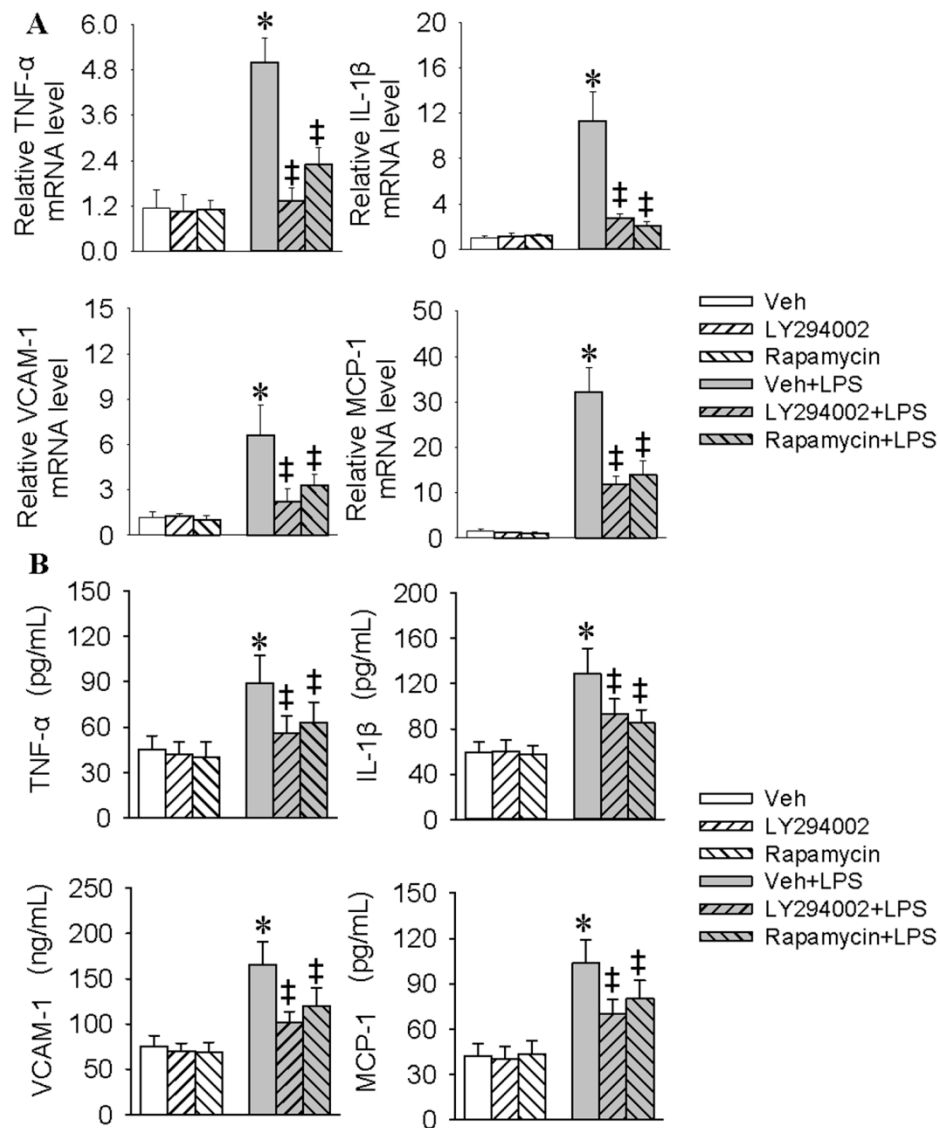

**Figure S9.** The HMEC-1 cells were pretreated with LY294002 (10  $\mu$ M), or mTOR inhibitor rapamycin (200 nM) for 6 h before LPS incubation for 48 h. The mRNA expressions of TNF- $\alpha$ , IL-1 $\beta$ , VCAM-1 and MCP-1 were detected by real time quantitative PCR (A) and ELISA (B). Values are mean $\pm$ S.D. \* $p$ <0.05 vs. Veh, † $p$  < 0.05 vs Veh+LPS.  $n$  = 4 for each group for PCR and  $n$ =6 for each group for ELISA. LPS, lipopolysaccharide; TNF- $\alpha$ , tumor necrosis factor- $\alpha$ ; IL-1 $\beta$ , interleukin-1 $\beta$ ; VCAM-1, vascular cellular adhesion molecule-1; MCP-1, monocyte chemoattractant protein 1.
